# Supplementary material
Source: Elsevier journal article supplement (https://www.sciencedirect.com/science/article/pii/S2387020620302904)
Supplement: mmc1 [file S2387020620302904:mmc1.docx]

| Tabla S1. Caracterización molecular de los pacientes con mielofibrosis secundaria a trombocitemia (MF post-TE) o policitemia vera (MF post-PV). | | | |
| --- | --- | --- | --- |
| Perfil molecular, n (%)1 | MF post-TE  (n=216) | MF post-PV  (n=143) |  |
| *JAK2*  *CALR*  *MPL*  Triples negativos  No caracterizados | 83 (38)  58 (27)  3 (1)  10 (5)  62 (29) | 127 (89)  0 (0)  0 (0)  0 (0)  16 (11) |  |
| 1Porcentajes sobre el número total de casos. | | | |
