# Supplementary material
Source: Elsevier journal article supplement (https://www.sciencedirect.com/science/article/pii/S2387020620302904)
Supplement: mmc2 [file S2387020620302904:mmc2.docx]

| Tabla S2. Tratamientos recibidos por los pacientes que fallecieron por neoplasia secundaria. | | | |
| --- | --- | --- | --- |
| Paciente | Tipo mielofibrosis | Tipo  neoplasia | Secuencia de fármacos  (duración del tratamiento) |
| 1 | MF post-PV | Gástrica | Hidroxiurea (14 meses) |
| 2 | MFP | Colon | Eritropoyetina (ND) |
| 3 | MFP | Páncreas | Ninguno |
| 4 | MF post-PV | Mama | Fósforo radioactivo (ND) |
| 5 | MFP | Colon | Ninguno |
| 6 | MFP | Colon | Ninguno |
| 7 | MF post-TE | Metástasis primario desconocido | Hidroxiurea (25 meses)  Ruxolitinib (25 meses)  Darbepoetina (5 meses)  Danazol (2 meses) |
| 8 | MF post-PV | Melanoma | Hidroxiurea (75 meses) |
| 9 | MF post-PV | Espinocelular cutáneo | Hidroxiurea (167 meses)  Ruxolitinib (6 meses)  Eritropoyetina (6 meses)  Danazol (14 meses) |
| 10 | MFP | Pulmón | Hidroxiurea (17 meses)  Danazol (ND) |
| 11 | MFP | Colon | Hidroxiurea (148 meses)  Melfalán (ND) |
| 12 | MF post-TE | ND | Eritropoyetina (ND)  Hidroxiurea (34 meses)  Busulfán (2 meses) |
| 13 | MFP | ND | Hidroxiurea (1 mes)  Melfalán (3 meses) |
| 14 | MFP | ND | Ninguno |
| 15 | MF post-TE | ND | Hidroxiurea (ND)  Anagrelida (ND)  Eritropoyetina (ND) |
| MFP: mielofibrosis primaria.  MF post-PV: mielofibrosis post-policitemia.  MF post-TE: mielofibrosis post-trombocitemia.  ND: no disponible. | | | |
